# Supplementary material
Source: publisher figshare collection journal article supplement (https://tandf.figshare.com/ndownloader/files/17970752)
Supplement: Supplementary file 1 [file 17970752]

**Temporal trends in the incidence, characteristics and outcomes of hanging-related out-of-hospital cardiac arrest**

**Supplementary file**

**Figure S1.** Age-adjusted incidence rate of EMS-attended and EMS-treated cases overtime.
